# Supplementary material for: Optimization of confined direct analysis in real time mass spectrometry (DART-MS)
Source: Royal Society of Chemistry journal article supplement (doi:10.1039/d0an00031k), 2020-01-01
Supplement: d0an00031k1.pdf [file d0an00031k1.pdf]

# Supplemental Information for: Optimization of Confined Direct Analysis in Real Time Mass Spectrometry (DART-MS)

Edward Sisco<sup>a</sup>, Matthew Staymates<sup>a</sup>, Thomas P. Forbes<sup>a</sup>

<sup>a</sup>National Institute of Standards and Technology

\*edward.sisco@nist.gov, 301-975-2093

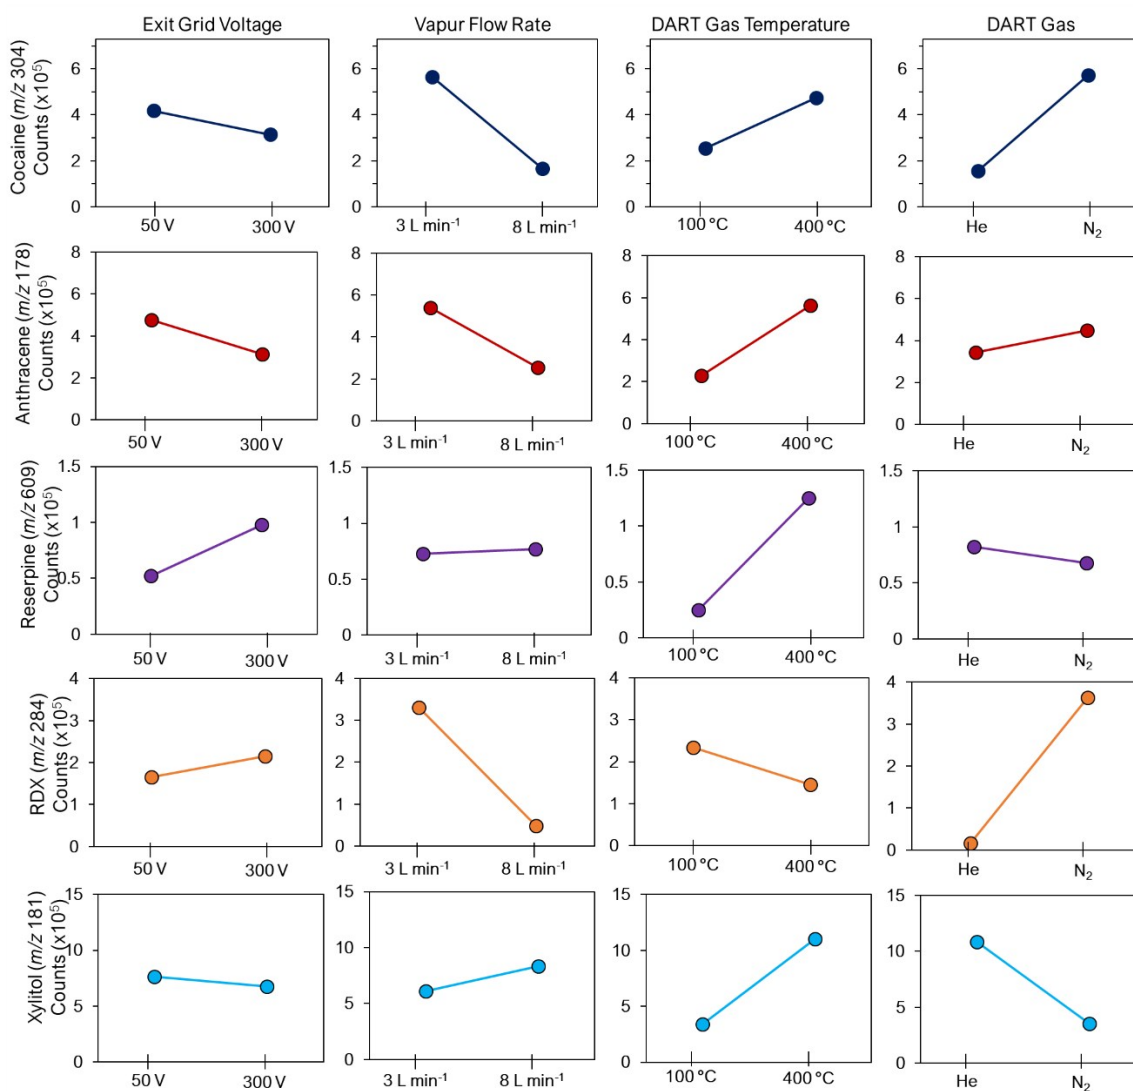

**Figure S1.** Main effects plots from the partial factorial design of experiments study for cocaine (navy blue), anthracene (red), reserpine (purple), RDX (orange), and xylitol (light blue).

**Table S1.** Parameters and results for each setting of the design of experiments study.

| Run #                             | 1              | 2              | 3              | 4              |
|-----------------------------------|----------------|----------------|----------------|----------------|
| DART Exit Grid (V)                | 50             | 300            | 50             | 300            |
| Vapur Flow (L min <sup>-1</sup> ) | 3              | 3              | 8              | 8              |
| DART Gas Temp (°C)                | 100            | 100            | 100            | 100            |
| DART Gas                          | He             | N <sub>2</sub> | N <sub>2</sub> | He             |
| Average Analyte Response (counts) |                |                |                |                |
| Anthracene                        | 15317          | 22315          | 23781          | 29661          |
| Cocaine                           | 109676         | 558434         | 238130         | 114943         |
| Reserpine                         | 17048          | 14829          | 41560          | 25995          |
| RDX                               | 38215          | 776070         | 111807         | 11353          |
| Xylitol                           | 280587         | 103244         | 297411         | 675226         |
| Run #                             | 5              | 6              | 7              | 8              |
| DART Exit Grid (V)                | 50             | 300            | 50             | 300            |
| Vapur Flow (L min <sup>-1</sup> ) | 3              | 3              | 8              | 8              |
| DART Gas Temp (°C)                | 400            | 400            | 400            | 400            |
| DART Gas                          | N <sub>2</sub> | He             | He             | N <sub>2</sub> |
| Average Analyte Response (counts) |                |                |                |                |
| Anthracene                        | 118735         | 58926          | 33074          | 14749          |
| Cocaine                           | 1251219        | 337861         | 66962          | 242630         |
| Reserpine                         | 61947          | 197617         | 87768          | 152391         |
| RDX                               | 502752         | 6604           | 6909           | 64468          |
| Xylitol                           | 576177         | 1476943        | 1911240        | 445836         |

**Table S2.** Valve dial positions for select Vapur flow rates used in this study.

| Vapur Flow Rate (L min <sup>-1</sup> ) | 2                               | 3   | 4   | 5   | 6   | 7                                | 8   |
|----------------------------------------|---------------------------------|-----|-----|-----|-----|----------------------------------|-----|
| Dial Position                          | 2.5                             | 3.5 | 5.0 | 7.0 | 8.5 | 0.0                              | 1.0 |
|                                        | 1 <sup>st</sup> Turn (Red Band) |     |     |     |     | 2 <sup>nd</sup> Turn (Blue Band) |     |

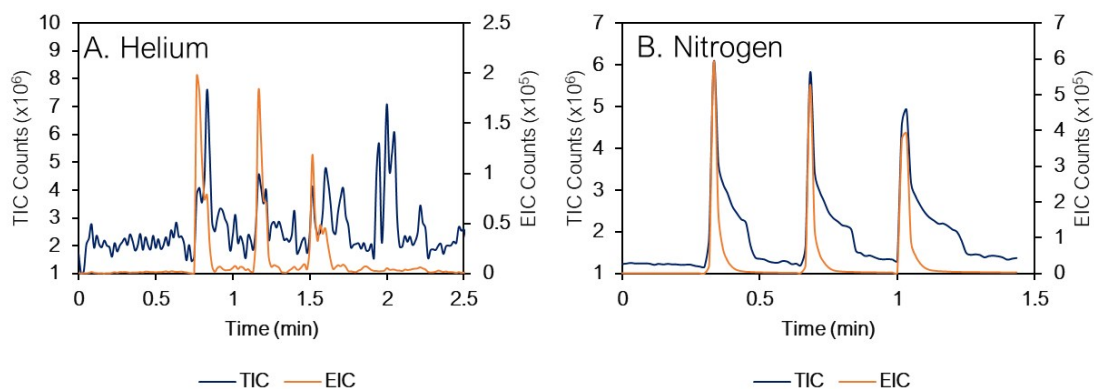

**Figure S2.** Example total ion chromatographs (TICs, blue trace) and corresponding extracted ion chromatographs (EICs, orange trace) of cocaine when using (A.) helium and (B.) nitrogen at a Vapor flow rate of 4.5 L min<sup>-1</sup>.

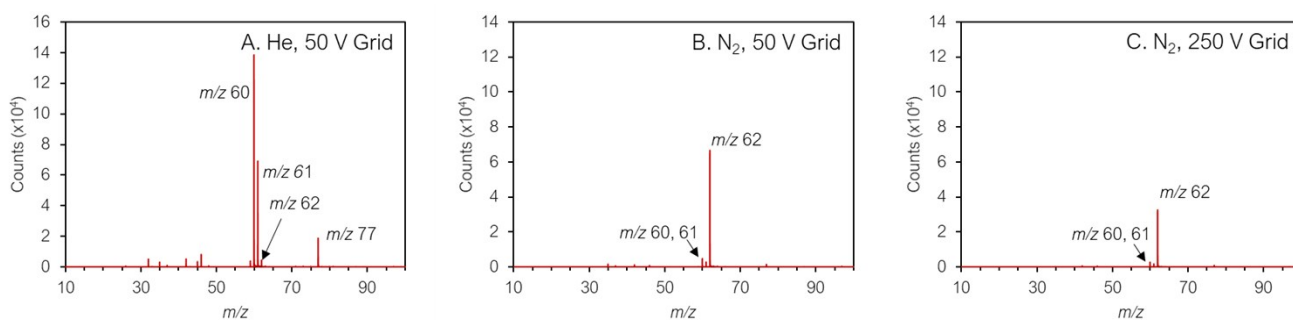

**Figure S3.** Negative mode background spectra when using helium (A.) and nitrogen (B. and C.) as the DART ionization gas. Also shown is background spectra using a -50 V DART exit grid voltage (B.) and a voltage of -250 V.

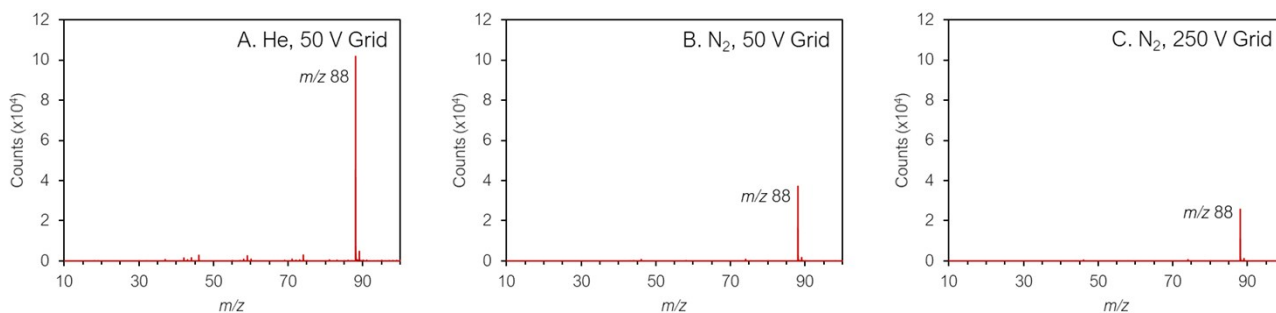

**Figure S4** Positive mode background spectra when using helium (A.) and nitrogen (B. and C.) as the DART ionization gas. Also shown is background spectra using a +50 V DART exit grid voltage (B.) and a voltage of +250 V.

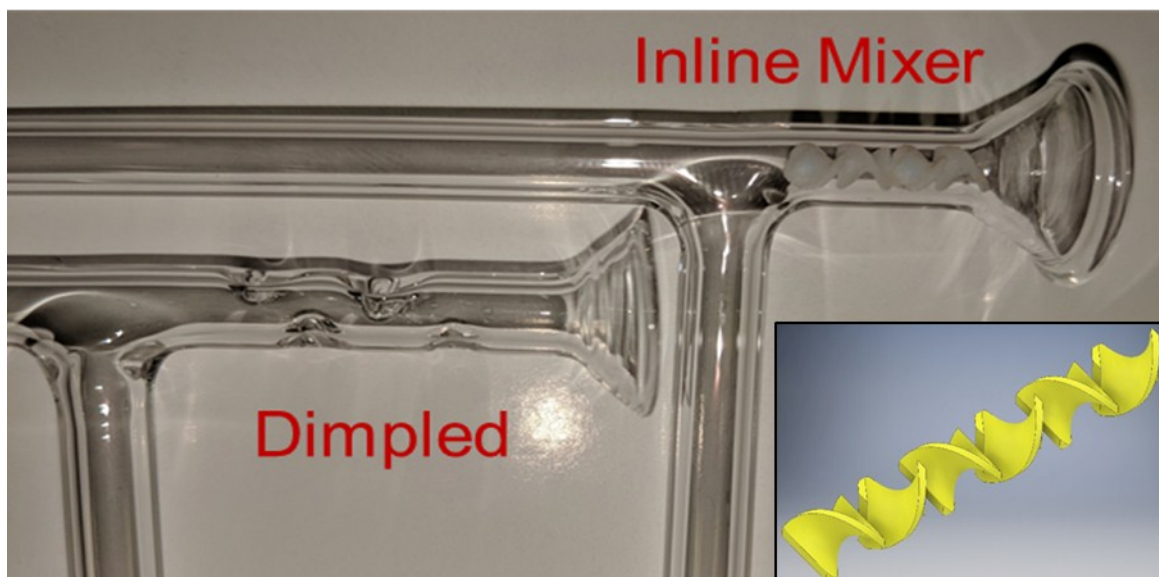

**Figure S5.** Photo of inline mixer (top) and dimpled junction (bottom) modifications. A CAD drawing of the inline mixer is shown in the inset of the figure.

#### Supplemental Videos

**Video S1.** Schlieren imaging of the TD-DART front end at increasing Vapor flow rates when using nitrogen as the DART ionization gas.

**Video S2.** Schlieren imaging of the TD-DART front end at increasing Vapor flow rates when using helium as the DART ionization gas.

**Video S3.** High-speed video of the TD-DART junction when using helium and nitrogen at a Vapor flow rate of  $3.5 \text{ L min}^{-1}$ . Theatrical fog was used to simulate the analyte vapor.

**Video S4.** High-speed video of the TD-DART junction when using helium and nitrogen at a Vapor flow rate of  $8 \text{ L min}^{-1}$ . Theatrical fog was used to simulate the analyte vapor.

**Video S5.** High-speed video of the TD-DART junction containing the in-line mixer modification using helium and a Vapor flow rate of  $3.5 \text{ L min}^{-1}$ . Theatrical fog was used to simulate the analyte vapor.

**Video S6.** High-speed video of the TD-DART junction with the dimple modification when using helium and nitrogen at a Vapor flow rate of  $3.5 \text{ L min}^{-1}$ . Theatrical fog was used to simulate the analyte vapor.

**Video S7.** Schlieren imaging of the TD-DART front end, using the dimple modification, at increasing Vapor flow rates when using helium as the DART ionization gas.
